# Supplementary material
Source: PubMed Central journal article supplement (PMC2849822)
Supplement: supp_109.076000_biolreprod.109.076000-3.pdf [file supp_109.076000_biolreprod.109.076000-3.pdf]

Kuzmin et al., Supplemental Table S1 Mouse mutations causing male infertility.

| Process              | Gene           | Testis phenotype  | Female Fertility  | Other pathology                                                             | Reference |
|----------------------|----------------|-------------------|-------------------|-----------------------------------------------------------------------------|-----------|
| <b>PGC Depletion</b> | <i>Bcl2l1</i>  | Sertoli cell only | infertile         |                                                                             | [1]       |
|                      | <i>Bmp4</i>    | PGC depletion     |                   | Embryonic lethal                                                            | [2]       |
|                      | <i>Bub1</i>    | PGC depletion     |                   | Embryonic lethal                                                            | [3]       |
|                      | <i>Dazl</i>    | Sertoli cell only | infertile         | no                                                                          | [4]       |
|                      | <i>Espl1</i>   | Sertoli cell only | infertile         | no                                                                          | [5]       |
|                      | <i>Kit</i>     | Sertoli cell only | infertile         | Anemia, coat colour spotting                                                | [6]       |
|                      | <i>Kitl</i>    | Sertoli cell only | infertile         | Anemia, coat colour dilution                                                | [7]       |
|                      | <i>Pik3r1</i>  | Sertoli cell only | fertile           | no                                                                          | [5]       |
|                      | <i>Smad1</i>   |                   |                   | lethal                                                                      | [8]       |
|                      | <i>Smad5</i>   |                   |                   | lethal                                                                      | [9]       |
|                      | <i>Sohlh1</i>  | Sertoli cell only | infertile         | no                                                                          | [10]      |
|                      | <i>Sohlh2</i>  | Sertoli cell only |                   | no                                                                          | [11]      |
|                      | <i>Tia1</i>    | Sertoli cell only | infertile         | Small stature, partial embryonic lethality                                  | [12]      |
|                      |                |                   |                   |                                                                             |           |
|                      | <b>Meiosis</b> | <i>Aurkb</i>      | Reduced fertility | fertile                                                                     | no        |
| <i>Atm</i>           |                | Meiotic arrest    | infertile         | Ataxia telangiectasia                                                       | [14]      |
| <i>Bat3</i>          |                | azoospermia       | fertile           | impaired development of multiple tissues                                    | [15]      |
| <i>Bsg</i>           |                | Meiotic arrest    | infertile         | Partial lethality                                                           | [16, 17]  |
| <i>Ccna2</i>         |                | Meiotic arrest    | fertile           | no                                                                          | [18]      |
| <i>Dazap1</i>        |                | Meiotic arrest    | infertile         | perinatal lethality, growth retardation, progressive loss of renal function | [19]      |
| <i>Ddx4</i>          |                | Meiotic arrest    | fertile           | no                                                                          | [20]      |
| <i>Dmc1</i>          |                | Meiotic arrest    | infertile         | no                                                                          | [21, 22]  |
| <i>Dmrtc2</i>        |                | Meiotic arrest    | fertile           | no                                                                          | [23]      |
| <i>Ehmt2</i>         |                | Meiotic arrest    | fertile           | no                                                                          | [24]      |
| <i>H2afx</i>         |                | Meiotic arrest    | fertile           |                                                                             | [25]      |
| <i>Hsf1</i>          |                | Meiotic arrest    | fertile           | no                                                                          | [26]      |
| <i>Hspa2</i>         |                | Meiotic arrest    | fertile           | no                                                                          | [27]      |
| <i>Mlh1</i>          |                | Meiotic arrest    | infertile         | Increased susceptibility to tumour formation                                | [28]      |
| <i>Msh5</i>          |                | Meiotic arrest    | infertile         | no                                                                          | [29]      |
| <i>Msh4</i>          | Meiotic arrest | infertile         | no                | [30]                                                                        |           |
| <i>Mybl1</i>         | Meiotic arrest | fertile           | Small stature,    | [31]                                                                        |           |

|                       |               |                         |           |                                                                       |          |
|-----------------------|---------------|-------------------------|-----------|-----------------------------------------------------------------------|----------|
|                       |               |                         |           | defective breast development                                          |          |
|                       | <i>Opr1</i>   | Meiotic arrest          |           |                                                                       | [32]     |
|                       | <i>Rad51c</i> | Meiotic arrest          | infertile | no                                                                    | [33]     |
|                       | <i>Sgol2</i>  | Meiotic arrest          | infertile | hypogonadism                                                          | [34]     |
|                       | <i>Siah1a</i> | Meiotic arrest          | fertile   | Partially lethal                                                      | [35]     |
|                       | <i>Spo11</i>  | Meiotic arrest          | infertile |                                                                       | [36, 37] |
|                       | <i>Stx2</i>   | Meiotic arrest          | fertile   | no                                                                    | [38]     |
|                       | <i>Sycp2</i>  | Meiotic arrest          | reduced   | no                                                                    | [39]     |
|                       | <i>Sycp3</i>  | Meiotic arrest          | infertile |                                                                       | [40, 41] |
|                       | <i>Trip13</i> | Meiotic arrest          | infertile | no                                                                    | [42]     |
|                       | <i>Ubb</i>    | Meiotic arrest          | infertile | hypogonadism                                                          | [43]     |
|                       | <i>Uchl1</i>  | Meiotic arrest          | infertile | no                                                                    | [44]     |
|                       |               |                         |           |                                                                       |          |
| <b>Spermiogenesis</b> | <i>Apaf1</i>  | Azoospermia             | fertile   | High perinatal lethality                                              | [45]     |
|                       | <i>Aurkc</i>  | Teratozoospermia        | fertile   | no                                                                    | [13]     |
|                       | <i>Bax</i>    | Azoospermia             | fertile   | Enlarged spleen                                                       | [1]      |
|                       | <i>Bbs1</i>   | Asthenoteratozoospermia | fertile   | Retinal degeneration, obesity, neuroanatomical defects, cilia defects | [46]     |
|                       | <i>Bcl2l2</i> | Azoospermia             | fertile   | no                                                                    | [47]     |
|                       | <i>Bmp8b</i>  | Hypospermatogenesis     |           | no                                                                    | [48]     |
|                       | <i>Brdt</i>   | OAT*                    | fertile   | no                                                                    | [49]     |
|                       | <i>Brwd1</i>  | OAT                     | infertile | no                                                                    | [50]     |
|                       | <i>Cadm1</i>  | OAT*                    | fertile   |                                                                       | [51, 52] |
|                       | <i>Camk4</i>  | Hypospermatogenesis     | fertile   | no                                                                    | [53]     |
|                       | <i>Cdk4</i>   | Hypospermatogenesis     | infertile | diabetes                                                              | [54]     |
|                       | <i>Cib1</i>   | Azoospermia             | fertile   | no                                                                    | [55]     |
|                       | <i>Cpeb1</i>  | azoospermia             | infertile |                                                                       | [56]     |
|                       | <i>Crem</i>   | Azoospermia             | fertile   | no                                                                    | [57, 58] |
|                       | <i>Cstf2t</i> | OAT*                    | fertile   | no                                                                    | [59]     |
|                       | <i>Cugbp1</i> | Azoospermia             | infertile | Growth retardation                                                    | [60]     |
|                       | <i>Cyld</i>   | Azoospermia             | fertile   | no                                                                    | [61]     |
|                       | <i>Dhh</i>    | Azoospermia             | fertile   | no                                                                    | [62]     |
|                       | <i>Dmrt1</i>  | Azoospermia             | fertile   |                                                                       | [63]     |
|                       | <i>Egr4</i>   | Hypospermatogenesis     | fertile   | no                                                                    | [64]     |
|                       | <i>Esr1</i>   | Hypospermatogenesis     | infertile | no                                                                    | [65]     |

|  |               |                        |                   |                                                                                |          |
|--|---------------|------------------------|-------------------|--------------------------------------------------------------------------------|----------|
|  |               | esis                   |                   |                                                                                |          |
|  | <i>Foxa3</i>  | Sertoli cell only      | fertile           |                                                                                | [66]     |
|  | <i>Fshr</i>   | Hypospermatogenesis    | infertile         | Low testosterone                                                               | [67]     |
|  | <i>Fus</i>    | Azoospermia            | Reduced fertility | Some perinatal lethality                                                       | [68]     |
|  | <i>Gba2</i>   | Globozoospermia        | fertile           | Glycolipid storage disease                                                     | [69]     |
|  | <i>Gdi1</i>   | Azoospermia            | infertile         |                                                                                | [70]     |
|  | <i>Gdnf</i>   | Hypospermatogenesis    | fertile           | Testicular tumours                                                             | [71]     |
|  | <i>Gja1</i>   | Azoospermia            | infertile         | Impaired mammary gland development, cardiac defects, embryonic lethality       | [72]     |
|  | <i>Gpx4</i>   | Oligozoospermia        | fertile           | no                                                                             | [73]     |
|  | <i>Hmgb2</i>  | Azoospermia            | fertile           |                                                                                | [74]     |
|  | <i>Hspa4l</i> | Oligoasthenozoospermia | fertile           | Hydronephrosis                                                                 | [75]     |
|  | <i>Igf1</i>   | Hypospermatogenesis    | infertile         | Reduced mating behaviour                                                       | [76]     |
|  | <i>Insl3</i>  | Azoospermia            | Reduced fertility | cryptorchidism                                                                 | [77]     |
|  | <i>Jund</i>   | OAT*                   | fertile           | Small stature                                                                  | [78]     |
|  | <i>Lhcgr</i>  | azoospermia            | infertile         |                                                                                | [79, 80] |
|  | <i>Limk2</i>  | azoospermia            | fertile           |                                                                                | [81]     |
|  | <i>Lipe</i>   | Azoospermia            | fertile           | no                                                                             | [82]     |
|  | <i>Lmtk2</i>  | Azoospermia            | fertile           | no                                                                             | [83]     |
|  | <i>Man2a2</i> | azoospermia            | fertile           |                                                                                | [84]     |
|  | <i>Mll5</i>   | azoospermia            | Reduced fertility | post-natal lethality, retarded growth, abnormalities in hematopoietic lineages | [85]     |
|  | <i>Mtap7</i>  | Azoospermia            | fertile           | no                                                                             | [86]     |
|  | <i>Mtr</i>    | Hypospermatogenesis    | infertile         | Multiple defects                                                               | [87]     |
|  | <i>Nek1</i>   |                        | fertile           | Polycystic kidney, facial dysmorphism                                          | [88]     |
|  | <i>Nhlh2</i>  | Azoospermia            | fertile           | Hypogonadism, obesity                                                          | [89]     |
|  | <i>Nphp1</i>  | oligoteratozoospermia  | fertile           | no                                                                             | [90]     |
|  | <i>P2rx1</i>  | oligospermia           | fertile           |                                                                                | [91]     |
|  | <i>Pms2</i>   | Teratozoospermia       | fertile           | Increased incidence of lymphomas,                                              | [92]     |

|                       |                 |                         |           |                                                                                    |            |
|-----------------------|-----------------|-------------------------|-----------|------------------------------------------------------------------------------------|------------|
|                       |                 |                         |           | sarcomas                                                                           |            |
|                       | <i>Ppp1cc</i>   | Azoospermia             | fertile   | no                                                                                 | [93]       |
|                       | <i>Prkar1a</i>  | OAT*                    | fertile   | Neoplasia, cardiac and cutaneous myxomas, increased incidence of endocrine tumors. | [94]       |
|                       | <i>Prm1</i>     | Azoospermia             | fertile   |                                                                                    | [95]       |
|                       | <i>Prm2</i>     | Azoospermia             | fertile   |                                                                                    | [95]       |
|                       | <i>Psme4</i>    | OAT*                    | fertile   | no                                                                                 | [96]       |
|                       | <i>Rara</i>     | Azoospermia             |           | High perinatal lethality                                                           | [97]       |
|                       | <i>Rpgr</i>     | OAT                     | fertile   | none                                                                               | [98]       |
|                       | <i>Rxb</i>      | OAT*                    |           | Pituitary enlarged                                                                 | [99]       |
|                       | <i>Sbf1</i>     | Azoospermia             | fertile   | no                                                                                 | [100]      |
|                       | <i>Slc12a2</i>  | Azoospermia             | fertile   | Inner ear defects                                                                  | [101]      |
|                       | <i>Spag16</i>   | Oligoasthenozoospermia  | fertile   | no                                                                                 | [102]      |
|                       | <i>Spem1</i>    | Asthenoteratozoospermia | fertile   | no                                                                                 | [103]      |
|                       | <i>Spz1</i>     | oligozoospermia         | fertile   | no                                                                                 | [104]      |
|                       | <i>Strbp</i>    | oligozoospermia         | fertile   | Neurologic defects?                                                                | [105]      |
|                       | <i>Styx</i>     | azoospermia             | fertile   |                                                                                    | [106]      |
|                       | <i>Tarbp2</i>   | OAT*                    | Fertile?  | Small stature, some perinatal lethality                                            | [107]      |
|                       | <i>Tbpl1</i>    | azoospermia             | fertile   |                                                                                    | [108, 109] |
|                       | <i>Tex18</i>    | Asthenoteratozoospermia | fertile   | no                                                                                 | [110]      |
|                       | <i>Tnp1</i>     | Oligozoospermia         | fertile   |                                                                                    | [111]      |
|                       | <i>Tnp2</i>     | Oligozoospermia         | fertile   |                                                                                    | [112]      |
|                       | <i>Ube2b</i>    | Azoospermia             | fertile   | no                                                                                 | [113]      |
|                       | <i>Wipf3</i>    | Teratozoospermia        | fertile   | no                                                                                 | [114]      |
|                       |                 |                         |           |                                                                                    |            |
| <b>Sperm Function</b> | <i>Ace</i>      | Infertile sperm         | fertile   | no                                                                                 | [115]      |
|                       | <i>Adam2</i>    | Infertile sperm         | fertile   |                                                                                    | [116, 117] |
|                       | <i>Adam3</i>    | Infertile sperm         | fertile   |                                                                                    | [116, 118] |
|                       | <i>Agfg1</i>    | Globozoospermia         | fertile   |                                                                                    | [119]      |
|                       | <i>Apob</i>     | Reduced fertility       | fertile   |                                                                                    | [120]      |
|                       | <i>B4galt1</i>  | Infertile sperm         | infertile | Variable embryonic lethality                                                       | [121, 122] |
|                       | <i>Catsper3</i> | Asthenozoospermia       | fertile   | no                                                                                 | [123]      |
|                       | <i>Catsper4</i> | Asthenozoospermia       | fertile   | no                                                                                 | [123]      |

|                  |                |                        |                   |                                                                            |                 |
|------------------|----------------|------------------------|-------------------|----------------------------------------------------------------------------|-----------------|
|                  |                | a                      |                   |                                                                            |                 |
|                  | <i>Clgn</i>    | Infertile sperm        | fertile           | no                                                                         | [124]           |
|                  | <i>Csnk2a2</i> | Globozoospermia        | fertile           | no                                                                         | [125]           |
|                  | <i>Cyp19a1</i> | Reduced fertility      | infertile         | Bone defects,<br>internal organ<br>hyperplasia                             | [126, 127]      |
|                  | <i>Dnahc1</i>  | immotile               | fertile           |                                                                            | [128]           |
|                  | <i>Fanca</i>   | Reduced fertility      | Reduced fertility | Fanconi's anemia                                                           | [129]           |
|                  | <i>Fancc</i>   | Reduced fertility      | Reduced fertility | Fanconi's anemia,<br>hypogonadism                                          | [130]           |
|                  | <i>Illrn</i>   | Reduced fertility      | fertile           |                                                                            | [131]           |
|                  | <i>Inpp5b</i>  | Reduced motility       | fertile           |                                                                            | [132]           |
|                  | <i>Nr0b1</i>   | Reduced fertility      | fertile           | no (X linked)                                                              | [133]           |
|                  | <i>Nsun7</i>   | Asthenozoospermi<br>a  | fertile           | no                                                                         | [134]           |
|                  | <i>Ovol1</i>   | Reduced fertility      |                   | Coat anomalies,<br>kidney cysts,<br>Bardet-Biedl<br>syndrome in<br>humans? | [135]           |
|                  | <i>Pcsk4</i>   | Infertile sperm        | fertile           | no                                                                         | [136]           |
|                  | <i>Pgap1</i>   | Infertile Sperm        |                   | Otocephaly,<br>growth<br>retardation,<br>perinatal lethality               | [137]           |
|                  | <i>Poll</i>    | immotile               | fertile           | Some embryonic<br>lethality                                                | [138]           |
|                  | <i>Prkaca</i>  | immotile               |                   | Mostly lethal                                                              | [139]           |
|                  | <i>Prlr</i>    | Reduced fertility      | infertile         | no                                                                         | [140]           |
|                  | <i>Ros1</i>    | immotile               | fertile           |                                                                            | [141, 142]      |
|                  | <i>Smcp</i>    | immotile               | fertile           |                                                                            | [143]           |
|                  | <i>Tal</i>     | Infertile sperm        | fertile           | no                                                                         | [144]           |
|                  | <i>Tekt4</i>   | Asthenozoospermi<br>a  | fertile           | no                                                                         | [145]           |
|                  | <i>Tpst2</i>   | Infertile sperm        | fertile           | Growth<br>retardation                                                      | [146]           |
|                  | <i>Vdac3</i>   | immotile               | fertile           |                                                                            | [147]           |
|                  | <i>Zpbp</i>    | Globozoospermia        | fertile           | no                                                                         | [148]           |
|                  | <i>Zpbp2</i>   | Infertile sperm        | fertile           | no                                                                         | [148]           |
|                  |                |                        |                   |                                                                            |                 |
| <b>Endocrine</b> | <i>Adra1b</i>  | Reduced fertility      | fertile           | no                                                                         | [149]           |
|                  | <i>Ar</i>      | Feminized<br>genitalia | fertile           | cryptorchidism                                                             | [150]           |
|                  | <i>Egr1</i>    | Reduced LH             | infertile         |                                                                            | [151]           |
|                  | <i>Hsd17b2</i> | Sertoli cell only      | fertile           | Growth<br>retardation,<br>delayed eye<br>opening                           | [107, 152, 153] |

|                            |                |                            |            |                                            |            |
|----------------------------|----------------|----------------------------|------------|--------------------------------------------|------------|
|                            | <i>Nr2f2</i>   | azoospermia                |            | hypogonadism,<br>leydig cell<br>hypoplasia | [154]      |
|                            | <i>Vdr</i>     | Defective estrogen         | infertile  |                                            | [152, 155] |
|                            |                |                            |            |                                            |            |
| <b>Genital Tract/Other</b> | <i>Acvr1</i>   | delayed/reduced            | fertile    | Small testes                               | [156]      |
|                            | <i>Adamts2</i> | oligozoospermia            | fertile    | Fragile skin                               | [157]      |
|                            | <i>Amh</i>     | obstruction                | infertile  | Developmental<br>obstruction               | [158, 159] |
|                            | <i>Amhr2</i>   | obstruction                | fertile    | Developmental<br>obstruction               | [160]      |
|                            | <i>Bcl6</i>    | Stem cell<br>apoptosis     | fertile    | Reduced fertility                          | [161]      |
|                            | <i>Bmp8a</i>   | Progressive<br>infertility | fertile    |                                            | [162]      |
|                            | <i>Cenpb</i>   | hypogonadal                | subfertile |                                            | [163, 164] |
|                            | <i>Cga</i>     | hypogonadal                | infertile  | hypothyroidism                             | [165]      |
|                            | <i>Cldn11</i>  | Testis architecture        | fertile    |                                            | [166]      |
|                            | <i>Csf1</i>    | Reduced<br>testosterone    | subfertile |                                            | [167]      |
|                            | <i>Cux1</i>    | oligozoospermia            | fertile    |                                            | [168]      |
|                            | <i>Cyp11a1</i> | azoospermia                |            | Embryonic lethal                           | [169]      |
|                            | <i>Emx2</i>    | No gonads                  |            | Embryonic lethal                           | [170]      |
|                            | <i>Etv4</i>    | Impaired sperm<br>release  | fertile    |                                            | [171]      |
|                            | <i>Fancg</i>   | hypogonadism               | infertile  |                                            | [172]      |
|                            | <i>Fgf9</i>    | Sex reversal               |            | lethal                                     | [173]      |
|                            | <i>Fmr1</i>    | macrorchidism              |            |                                            | [174]      |
|                            | <i>Gdf7</i>    | Seminal vesicle<br>defects | fertile    |                                            | [175]      |
|                            | <i>Ggt1</i>    | hypogonadism               | infertile  |                                            | [176, 177] |
|                            | <i>H3f3a</i>   | Reduced fertility          | fertile    |                                            | [178]      |
|                            | <i>Hnf1a</i>   | Vas deferens<br>defects    | infertile  | Dwarfism,<br>diabetes                      | [179]      |
|                            | <i>Hoxa10</i>  | Reduced fertility          | subfertile |                                            | [180]      |
|                            | <i>Hoxa11</i>  | Malformed vas              | infertile  |                                            | [181]      |
|                            | <i>Inha</i>    | Secondary<br>infertility   | infertile  | Gonadal tumours                            | [182, 183] |
|                            | <i>Lep</i>     | hypogonadism               | infertile  | obesity                                    | [184, 185] |
|                            | <i>Lepr</i>    | hypogonadism               | infertile  | Obesity, diabetes                          | [186]      |
|                            | <i>Mark2</i>   |                            | infertile  | dwarfism                                   | [187]      |
|                            | <i>Noc2l</i>   | hypogonadism               | infertile  | Obesity                                    | [188]      |
|                            | <i>Nr5a1</i>   | Gonadal agenesis           |            | lethal                                     | [189]      |
|                            | <i>Pou1f1</i>  | hypogonadism               | infertile  | dwarfism                                   | [190]      |
|                            | <i>Ppm1d</i>   | Testicular atrophy         | Fertile    |                                            | [191]      |

|  |                 |                               |           |                                    |       |
|--|-----------------|-------------------------------|-----------|------------------------------------|-------|
|  | <i>Rad23b</i>   | Secondary                     |           | Mostly lethal,<br>multiple defects | [192] |
|  | <i>Rarg</i>     | Seminal vesicle<br>defects    | fertile   | tumours                            | [193] |
|  | <i>Rxfp2</i>    | cryptorchidism                | fertile   |                                    | [194] |
|  | <i>Serpine2</i> | Seminal vesicle<br>defects    | fertile   |                                    | [195] |
|  | <i>Serpina5</i> | Sertoli cell<br>destruction   | fertile   |                                    | [196] |
|  | <i>Sh2b1</i>    | subfertility                  | infertile |                                    | [197] |
|  | <i>Sp4</i>      | Mating behaviour              | fertile   |                                    | [198] |
|  | <i>Star</i>     | Feminization of<br>genitalia  |           | lethal                             | [199] |
|  | <i>Tert</i>     | Progressive germ<br>cell loss | infertile |                                    | [200] |
|  | <i>Ube3a</i>    | Testicular<br>hypoplasia      | infertile |                                    | [201] |
|  | <i>Wtl</i>      | Gonadal agenesis              | infertile | Lethal, kidney<br>defects          | [202] |
|  | <i>Wnt7a</i>    | Mullerian duct<br>regression  | infertile |                                    | [203] |
|  |                 |                               |           |                                    |       |

#### REFERENCES USED IN SUPPLEMENTAL DATA

1. Rucker EB,3rd, Dierisseau P, Wagner KU, Garrett L, Wynshaw-Boris A, Flaws JA, Hennighausen L. Bcl-x and Bax regulate mouse primordial germ cell survival and apoptosis during embryogenesis. *Mol Endocrinol* 2000; 14:1038-1052.
2. Lawson KA, Dunn NR, Roelen BA, Zeinstra LM, Davis AM, Wright CV, Korving JP, Hogan BL. Bmp4 is required for the generation of primordial germ cells in the mouse embryo. *Genes Dev* 1999; 13:424-436.
3. Perera D, Tilston V, Hopwood JA, Barchi M, Boot-Handford RP, Taylor SS. Bub1 maintains centromeric cohesion by activation of the spindle checkpoint. *Dev Cell* 2007; 13:566-579.
4. Ruggiu M, Speed R, Taggart M, McKay SJ, Kilanowski F, Saunders P, Dorin J, Cooke HJ. The mouse Dazla gene encodes a cytoplasmic protein essential for gametogenesis. *Nature* 1997; 389:73-77.
5. Huang X, Andreu-Vieyra CV, York JP, Hatcher R, Lu T, Matzuk MM, Zhang P. Inhibitory phosphorylation of separase is essential for genome stability and viability of murine embryonic germ cells. *PLoS Biol* 2008; 6:e15.
6. Blume-Jensen P, Jiang G, Hyman R, Lee KF, O'Gorman S, Hunter T. Kit/stem cell factor receptor-induced activation of phosphatidylinositol 3'-kinase is essential for male fertility. *Nat Genet* 2000; 24:157-162.
7. Kissel H, Timokhina I, Hardy MP, Rothschild G, Tajima Y, Soares V, Angeles M, Whitlow SR, Manova K, Besmer P. Point mutation in kit receptor tyrosine kinase reveals essential roles for kit signaling in spermatogenesis and oogenesis without affecting other kit responses. *EMBO J* 2000; 19:1312-1326.
8. Tremblay KD, Dunn NR, Robertson EJ. Mouse embryos lacking Smad1 signals display defects in extra-embryonic tissues and germ cell formation. *Development* 2001; 128:3609-3621.
9. Chang H, Matzuk MM. Smad5 is required for mouse primordial germ cell development. *Mech Dev* 2001; 104:61-67.

10. Ballow D, Meistrich ML, Matzuk M, Rajkovic A. *Sohlh1* is essential for spermatogonial differentiation. *Dev Biol* 2006; 294:161-167.
11. Hao J, Yamamoto M, Richardson TE, Chapman KM, Denard BS, Hammer RE, Zhao GQ, Hamra FK. *Sohlh2* Knockout Mice Are Male-Sterile Because of Degeneration of Differentiating Type A Spermatogonia. *Stem Cells* 2008; 26:1587-1597.
12. Beck AR, Miller IJ, Anderson P, Streuli M. RNA-binding protein TIAR is essential for primordial germ cell development. *Proc Natl Acad Sci U S A* 1998; 95:2331-2336.
13. Kimmins S, Crosio C, Kotaja N, Hirayama J, Monaco L, Hoog C, van Duin M, Gossen JA, Sassone-Corsi P. Differential functions of the Aurora-B and Aurora-C kinases in mammalian spermatogenesis. *Mol Endocrinol* 2007; 21:726-739.
14. Xu Y, Ashley T, Brainerd EE, Bronson RT, Meyn MS, Baltimore D. Targeted disruption of ATM leads to growth retardation, chromosomal fragmentation during meiosis, immune defects, and thymic lymphoma. *Genes Dev* 1996; 10:2411-2422.
15. Sasaki T, Marcon E, McQuire T, Arai Y, Moens PB, Okada H. *Bat3* deficiency accelerates the degradation of Hsp70-2/HspA2 during spermatogenesis. *J Cell Biol* 2008; 182:449-458.
16. Kuno N, Kadomatsu K, Fan QW, Hagihara M, Senda T, Mizutani S, Muramatsu T. Female sterility in mice lacking the *basigin* gene, which encodes a transmembrane glycoprotein belonging to the immunoglobulin superfamily. *FEBS Lett* 1998; 425:191-194.
17. Igakura T, Kadomatsu K, Kaname T, Muramatsu H, Fan QW, Miyauchi T, Toyama Y, Kuno N, Yuasa S, Takahashi M, Senda T, Taguchi O, Yamamura K, Arimura K, Muramatsu T. A null mutation in *basigin*, an immunoglobulin superfamily member, indicates its important roles in peri-implantation development and spermatogenesis. *Dev Biol* 1998; 194:152-165.
18. Liu D, Matzuk MM, Sung WK, Guo Q, Wang P, Wolgemuth DJ. *Cyclin A1* is required for meiosis in the male mouse. *Nat Genet* 1998; 20:377-380.
19. Hsu LC, Chen H, Lin Y, Chu W, Lin M, Yan Y, Yen PH. *DAZAP1*, an hnRNP protein, is required for normal growth and spermatogenesis in mice. *RNA* 2008; 14:1814-1822.
20. Tanaka SS, Toyooka Y, Akasu R, Katoh-Fukui Y, Nakahara Y, Suzuki R, Yokoyama M, Noce T. The mouse homolog of *Drosophila Vasa* is required for the development of male germ cells. *Genes Dev* 2000; 14:841-853.
21. Pittman DL, Cobb J, Schimenti KJ, Wilson LA, Cooper DM, Brignull E, Handel MA, Schimenti JC. Meiotic prophase arrest with failure of chromosome synapsis in mice deficient for *Dmcl1*, a germline-specific RecA homolog. *Mol Cell* 1998; 1:697-705.
22. Yoshida K, Kondoh G, Matsuda Y, Habu T, Nishimune Y, Morita T. The mouse RecA-like gene *Dmcl1* is required for homologous chromosome synapsis during meiosis. *Mol Cell* 1998; 1:707-718.
23. Kawamata M, Nishimori K. Mice deficient in *Dmrt7* show infertility with spermatogenic arrest at pachytene stage. *FEBS Lett* 2006; 580:6442-6446.
24. Tachibana M, Nozaki M, Takeda N, Shinkai Y. Functional dynamics of H3K9 methylation during meiotic prophase progression. *EMBO J* 2007; 26:3346-3359.
25. Celeste A, Petersen S, Romanienko PJ, Fernandez-Capetillo O, Chen HT, Sedelnikova OA, Reina-San-Martin B, Coppola V, Meffre E, Difilippantonio MJ, Redon C, Pilch DR, Oлару A, Eckhaus M, Camerini-Otero RD, Tessarollo L, Livak F, Manova K, Bonner WM, Nussenzweig MC, Nussenzweig A. Genomic instability in mice lacking histone H2AX. *Science* 2002; 296:922-927.



26. Nakai A, Suzuki M, Tanabe M. Arrest of spermatogenesis in mice expressing an active heat shock transcription factor 1. *EMBO J* 2000; 19:1545-1554.
27. Dix DJ, Allen JW, Collins BW, Poorman-Allen P, Mori C, Blizard DR, Brown PR, Goulding EH, Strong BD, Eddy EM. HSP70-2 is required for desynapsis of synaptonemal complexes during meiotic prophase in juvenile and adult mouse spermatocytes. *Development* 1997; 124:4595-4603.
28. Edelmann W, Cohen PE, Kane M, Lau K, Morrow B, Bennett S, Umar A, Kunkel T, Cattoretti G, Chaganti R, Pollard JW, Kolodner RD, Kucherlapati R. Meiotic pachytene arrest in MLH1-deficient mice. *Cell* 1996; 85:1125-1134.
29. Edelmann W, Cohen PE, Kneitz B, Winand N, Lia M, Heyer J, Kolodner R, Pollard JW, Kucherlapati R. Mammalian MutS homologue 5 is required for chromosome pairing in meiosis. *Nat Genet* 1999; 21:123-127.
30. Kneitz B, Cohen PE, Avdievich E, Zhu L, Kane MF, Hou H, Jr, Kolodner RD, Kucherlapati R, Pollard JW, Edelmann W. MutS homolog 4 localization to meiotic chromosomes is required for chromosome pairing during meiosis in male and female mice. *Genes Dev* 2000; 14:1085-1097.
31. Toscani A, Mettus RV, Coupland R, Simpkins H, Litvin J, Orth J, Hatton KS, Reddy EP. Arrest of spermatogenesis and defective breast development in mice lacking A-myb. *Nature* 1997; 386:713-717.
32. Watson ML, Zinn AR, Inoue N, Hess KD, Cobb J, Handel MA, Halaban R, Duchene CC, Albright GM, Moreadith RW. Identification of morc (microorchidia), a mutation that results in arrest of spermatogenesis at an early meiotic stage in the mouse. *Proc Natl Acad Sci U S A* 1998; 95:14361-14366.
33. Kuznetsov S, Pellegrini M, Shuda K, Fernandez-Capetillo O, Liu Y, Martin BK, Burkett S, Southon E, Pati D, Tessarollo L, West SC, Donovan PJ, Nussenzweig A, Sharan SK. RAD51C deficiency in mice results in early prophase I arrest in males and sister chromatid separation at metaphase II in females. *J Cell Biol* 2007; 176:581-592.
34. Llano E, Gómez R, Gutiérrez-Caballero C, Herrán Y, Sánchez-Martín M, Vázquez-Quiñones L, Hernández T, de Álava E, Cuadrado A, Barbero JL, Suja JA, Pendás AM. Shugoshin-2 is essential for the completion of meiosis but not for mitotic cell division in mice. *Genes & Development* 2008; 22:2400-2413.
35. Dickins RA, Frew IJ, House CM, O'Bryan MK, Holloway AJ, Haviv I, Traficante N, de Kretser DM, Bowtell DD. The ubiquitin ligase component Siah1a is required for completion of meiosis I in male mice. *Mol Cell Biol* 2002; 22:2294-2303.
36. Baudat F, Manova K, Yuen JP, Jasin M, Keeney S. Chromosome synapsis defects and sexually dimorphic meiotic progression in mice lacking Spo11. *Mol Cell* 2000; 6:989-998.
37. Romanienko PJ, Camerini-Otero RD. The mouse Spo11 gene is required for meiotic chromosome synapsis. *Mol Cell* 2000; 6:975-987.
38. Akiyama K, Akimaru S, Asano Y, Khalaj M, Kiyosu C, Masoudi AA, Takahashi S, Katayama K, Tsuji T, Noguchi J, Kunieda T. A new ENU-induced mutant mouse with defective spermatogenesis caused by a nonsense mutation of the syntaxin 2/epimorphin (Stx2/Epim) gene. *J Reprod Dev* 2008; 54:122-128.
39. Yang F, De La Fuente R, Leu NA, Baumann C, McLaughlin KJ, Wang PJ. Mouse SYCP2 is required for synaptonemal complex assembly and chromosomal synapsis during male meiosis. *J Cell Biol* 2006; 173:497-507.
40. Yuan L, Liu JG, Zhao J, Brundell E, Daneholt B, Hoog C. The murine SCP3 gene is required for synaptonemal complex assembly, chromosome synapsis, and male fertility. *Mol Cell* 2000; 5:73-83.
41. Yuan L, Liu JG, Hoja MR, Wilbertz J, Nordqvist K, Hoog C. Female germ cell aneuploidy and embryo death in mice lacking the meiosis-specific protein SCP3. *Science* 2002; 296:1115-1118.

42. Li XC, Schimenti JC. Mouse pachytene checkpoint 2 (trip13) is required for completing meiotic recombination but not synapsis. *PLoS Genet* 2007; 3:e130.
43. Ryu KY, Sinnar SA, Reinholdt LG, Vaccari S, Hall S, Garcia MA, Zaitseva TS, Bouley DM, Boekelheide K, Handel MA, Conti M, Kopito RR. The mouse polyubiquitin gene *Ubb* is essential for meiotic progression. *Mol Cell Biol* 2008; 28:1136-1146.
44. Wang YL, Liu W, Sun YJ, Kwon J, Setsuie R, Osaka H, Noda M, Aoki S, Yoshikawa Y, Wada K. Overexpression of ubiquitin carboxyl-terminal hydrolase L1 arrests spermatogenesis in transgenic mice. *Mol Reprod Dev* 2006; 73:40-49.
45. Honarpour N, Du C, Richardson JA, Hammer RE, Wang X, Herz J. Adult Apaf-1-deficient mice exhibit male infertility. *Dev Biol* 2000; 218:248-258.
46. Davis RE, Swiderski RE, Rahmouni K, Nishimura DY, Mullins RF, Agassandian K, Philp AR, Searby CC, Andrews MP, Thompson S, Berry CJ, Thedens DR, Yang B, Weiss RM, Cassell MD, Stone EM, Sheffield VC. A knockin mouse model of the Bardet-Biedl syndrome 1 M390R mutation has cilia defects, ventriculomegaly, retinopathy, and obesity. *Proc Natl Acad Sci U S A* 2007; 104:19422-19427.
47. Print CG, Loveland KL, Gibson L, Meehan T, Stylianou A, Wreford N, de Kretser D, Metcalf D, Kontgen F, Adams JM, Cory S. Apoptosis regulator *bcl-w* is essential for spermatogenesis but appears otherwise redundant. *Proc Natl Acad Sci U S A* 1998; 95:12424-12431.
48. Ying Y, Liu XM, Marble A, Lawson KA, Zhao GQ. Requirement of *Bmp8b* for the generation of primordial germ cells in the mouse. *Mol Endocrinol* 2000; 14:1053-1063.
49. Shang E, Nickerson HD, Wen D, Wang X, Wolgemuth DJ. The first bromodomain of *Brdt*, a testis-specific member of the BET sub-family of double-bromodomain-containing proteins, is essential for male germ cell differentiation. *Development* 2007; 134:3507-3515.
50. Philipps DL, Wigglesworth K, Hartford SA, Sun F, Pattabiraman S, Schimenti K, Handel M, Eppig JJ, Schimenti JC. The dual bromodomain and WD repeat-containing mouse protein *BRWD1* is required for normal spermiogenesis and the oocyte-embryo transition. *Developmental Biology* 2008; 317:72-82.
51. Yamada D, Yoshida M, Williams YN, Fukami T, Kikuchi S, Masuda M, Maruyama T, Ohta T, Nakae D, Maekawa A, Kitamura T, Murakami Y. Disruption of spermatogenic cell adhesion and male infertility in mice lacking *TSLC1/IGSF4*, an immunoglobulin superfamily cell adhesion molecule. *Mol Cell Biol* 2006; 26:3610-3624.
52. Fujita E, Kouroku Y, Ozeki S, Tanabe Y, Toyama Y, Maekawa M, Kojima N, Senoo H, Toshimori K, Momoi T. Oligo-astheno-teratozoospermia in mice lacking *RA175/TSLC1/SynCAM/IGSF4A*, a cell adhesion molecule in the immunoglobulin superfamily. *Mol Cell Biol* 2006; 26:718-726.
53. Wu JY, Ribar TJ, Cummings DE, Burton KA, McKnight GS, Means AR. Spermiogenesis and exchange of basic nuclear proteins are impaired in male germ cells lacking *Camk4*. *Nat Genet* 2000; 25:448-452.
54. Rane SG, Dubus P, Mettus RV, Galbreath EJ, Boden G, Reddy EP, Barbacid M. Loss of *Cdk4* expression causes insulin-deficient diabetes and *Cdk4* activation results in beta-islet cell hyperplasia. *Nat Genet* 1999; 22:44-52.
55. Yuan W, Leisner TM, McFadden AW, Clark S, Hiller S, Maeda N, O'Brien DA, Parise LV. *CIB1* is essential for mouse spermatogenesis. *Mol Cell Biol* 2006; 26:8507-8514.
56. Tay J, Richter JD. Germ cell differentiation and synaptonemal complex formation are disrupted in *CPEB* knockout mice. *Dev Cell* 2001; 1:201-213.
57. Blendy JA, Kaestner KH, Weinbauer GF, Nieschlag E, Schutz G. Severe impairment of spermatogenesis in mice lacking the *CREM* gene. *Nature* 1996; 380:162-165.

58. Nantel F, Monaco L, Foulkes NS, Masquillier D, LeMeur M, Henriksen K, Dierich A, Parvinen M, Sassone-Corsi P. Spermiogenesis deficiency and germ-cell apoptosis in CREM-mutant mice. *Nature* 1996; 380:159-162.
59. Dass B, Tardif S, Park JY, Tian B, Weitlauf HM, Hess RA, Carnes K, Griswold MD, Small CL, Macdonald CC. Loss of polyadenylation protein tauCstF-64 causes spermatogenic defects and male infertility. *Proc Natl Acad Sci U S A* 2007; 104:20374-20379.
60. Kress C, Gautier-Courteille C, Osborne HB, Babinet C, Paillard L. Inactivation of CUG-BP1/CELF1 causes growth, viability, and spermatogenesis defects in mice. *Mol Cell Biol* 2007; 27:1146-1157.
61. Wright A, Reiley WW, Chang M, Jin W, Lee AJ, Zhang M, Sun SC. Regulation of early wave of germ cell apoptosis and spermatogenesis by deubiquitinating enzyme CYLD. *Dev Cell* 2007; 13:705-716.
62. Bitgood MJ, Shen L, McMahon AP. Sertoli cell signaling by Desert hedgehog regulates the male germline. *Curr Biol* 1996; 6:298-304.
63. Raymond CS, Murphy MW, O'Sullivan MG, Bardwell VJ, Zarkower D. Dmrt1, a gene related to worm and fly sexual regulators, is required for mammalian testis differentiation. *Genes Dev* 2000; 14:2587-2595.
64. Tourtellotte WG, Nagarajan R, Bartke A, Milbrandt J. Functional compensation by Egr4 in Egr1-dependent luteinizing hormone regulation and Leydig cell steroidogenesis. *Mol Cell Biol* 2000; 20:5261-5268.
65. Eddy EM, Washburn TF, Bunch DO, Goulding EH, Gladen BC, Lubahn DB, Korach KS. Targeted disruption of the estrogen receptor gene in male mice causes alteration of spermatogenesis and infertility. *Endocrinology* 1996; 137:4796-4805.
66. Behr R, Sackett SD, Bochkis IM, Le PP, Kaestner KH. Impaired male fertility and atrophy of seminiferous tubules caused by haploinsufficiency for Foxa3. *Dev Biol* 2007; 306:636-645.
67. Krishnamurthy H, Danilovich N, Morales CR, Sairam MR. Qualitative and quantitative decline in spermatogenesis of the follicle-stimulating hormone receptor knockout (FORKO) mouse. *Biol Reprod* 2000; 62:1146-1159.
68. Kuroda M, Sok J, Webb L, Baechtold H, Urano F, Yin Y, Chung P, de Rooij DG, Akhmedov A, Ashley T, Ron D. Male sterility and enhanced radiation sensitivity in TLS(-/-) mice. *EMBO J* 2000; 19:453-462.
69. Yildiz Y, Matern H, Thompson B, Allegood JC, Warren RL, Ramirez DM, Hammer RE, Hamra FK, Matern S, Russell DW. Mutation of beta-glucosidase 2 causes glycolipid storage disease and impaired male fertility. *J Clin Invest* 2006; 116:2985-2994.
70. Togawa A, Miyoshi J, Ishizaki H, Tanaka M, Takakura A, Nishioka H, Yoshida H, Doi T, Mizoguchi A, Matsuura N, Niho Y, Nishimune Y, Nishikawa S, Takai Y. Progressive impairment of kidneys and reproductive organs in mice lacking Rho GDIalpha. *Oncogene* 1999; 18:5373-5380.
71. Meng X, Lindahl M, Hyvonen ME, Parvinen M, de Rooij DG, Hess MW, Raatikainen-Ahokas A, Sainio K, Rauvala H, Lakso M, Pichel JG, Westphal H, Saarma M, Sariola H. Regulation of cell fate decision of undifferentiated spermatogonia by GDNF. *Science* 2000; 287:1489-1493.
72. Juneja SC, Barr KJ, Enders GC, Kidder GM. Defects in the germ line and gonads of mice lacking connexin43. *Biol Reprod* 1999; 60:1263-1270.
73. Puglisi R, Bevilacqua A, Carlomagno G, Lenzi A, Gandini L, Stefanini M, Mangia F, Boitani C. Mice overexpressing the mitochondrial phospholipid hydroperoxide glutathione peroxidase in male germ cells show abnormal spermatogenesis and reduced fertility. *Endocrinology* 2007; 148:4302-4309.
74. Ronfani L, Ferraguti M, Croci L, Ovitt CE, Scholer HR, Consalez GG, Bianchi ME. Reduced fertility and spermatogenesis defects in mice lacking chromosomal protein Hmgb2. *Development* 2001; 128:1265-1273.

75. Held T, Paprotta I, Khulan J, Hemmerlein B, Binder L, Wolf S, Schubert S, Meinhardt A, Engel W, Adham IM. Hspa4l-deficient mice display increased incidence of male infertility and hydronephrosis development. *Mol Cell Biol* 2006; 26:8099-8108.
76. Baker SM, Plug AW, Prolla TA, Bronner CE, Harris AC, Yao X, Christie DM, Monell C, Arnheim N, Bradley A, Ashley T, Liskay RM. Involvement of mouse Mlh1 in DNA mismatch repair and meiotic crossing over. *Nat Genet* 1996; 13:336-342.
77. Zimmermann S, Steding G, Emmen JM, Brinkmann AO, Nayernia K, Holstein AF, Engel W, Adham IM. Targeted disruption of the *Insl3* gene causes bilateral cryptorchidism. *Mol Endocrinol* 1999; 13:681-691.
78. Thepot D, Weitzman JB, Barra J, Segretain D, Stinnakre MG, Babinet C, Yaniv M. Targeted disruption of the murine *junD* gene results in multiple defects in male reproductive function. *Development* 2000; 127:143-153.
79. Zhang FP, Poutanen M, Wilbertz J, Huhtaniemi I. Normal prenatal but arrested postnatal sexual development of luteinizing hormone receptor knockout (LuRKO) mice. *Mol Endocrinol* 2001; 15:172-183.
80. Lei ZM, Mishra S, Zou W, Xu B, Foltz M, Li X, Rao CV. Targeted disruption of luteinizing hormone/human chorionic gonadotropin receptor gene. *Mol Endocrinol* 2001; 15:184-200.
81. Takahashi H, Koshimizu U, Miyazaki J, Nakamura T. Impaired spermatogenic ability of testicular germ cells in mice deficient in the LIM-kinase 2 gene. *Dev Biol* 2002; 241:259-272.
82. Chung S, Wang SP, Pan L, Mitchell G, Trasler J, Hermo L. Infertility and testicular defects in hormone-sensitive lipase-deficient mice. *Endocrinology* 2001; 142:4272-4281.
83. Kawa S, Ito C, Toyama Y, Maekawa M, Tezuka T, Nakamura T, Nakazawa T, Yokoyama K, Yoshida N, Toshimori K, Yamamoto T. Azoospermia in mice with targeted disruption of the *Brek/Lmtk2* (brain-enriched kinase/lemur tyrosine kinase 2) gene. *Proc Natl Acad Sci U S A* 2006; 103:19344-19349.
84. Akama TO, Nakagawa H, Sugihara K, Narisawa S, Ohyama C, Nishimura S, O'Brien DA, Moremen KW, Millan JL, Fukuda MN. Germ cell survival through carbohydrate-mediated interaction with Sertoli cells. *Science* 2002; 295:124-127.
85. Madan V, Madan B, Brykczynska U, Zilbermann F, Hogeveen K, Dohner K, Dohner H, Weber O, Blum C, Rodewald H, Sassone-Corsi P, Peters AHFM, Fehling HJ. Impaired function of primitive hematopoietic cells in mice lacking the Mixed-Lineage-Leukemia homolog *Mll5*. *Blood* 2008;
86. Komada M, McLean DJ, Griswold MD, Russell LD, Soriano P. E-MAP-115, encoding a microtubule-associated protein, is a retinoic acid-inducible gene required for spermatogenesis. *Genes Dev* 2000; 14:1332-1342.
87. Rudolph KL, Chang S, Lee HW, Blasco M, Gottlieb GJ, Greider C, DePinho RA. Longevity, stress response, and cancer in aging telomerase-deficient mice. *Cell* 1999; 96:701-712.
88. Upadhy P, Birkenmeier EH, Birkenmeier CS, Barker JE. Mutations in a NIMA-related kinase gene, *Nek1*, cause pleiotropic effects including a progressive polycystic kidney disease in mice. *Proc Natl Acad Sci U S A* 2000; 97:217-221.
89. Good DJ, Porter FD, Mahon KA, Parlow AF, Westphal H, Kirsch IR. Hypogonadism and obesity in mice with a targeted deletion of the *Nhlh2* gene. *Nat Genet* 1997; 15:397-401.
90. Jiang S, Chiou Y, Wang E, Lin H, Lee S, Lu H, Wang CL, Tang M, Li H. Targeted disruption of *Nphp1* causes male infertility due to defects in the later steps of sperm morphogenesis in mice. *Hum Mol Genet* 2008; 17:3368-3379.

91. Mulryan K, Gitterman DP, Lewis CJ, Vial C, Leckie BJ, Cobb AL, Brown JE, Conley EC, Buell G, Pritchard CA, Evans RJ. Reduced vas deferens contraction and male infertility in mice lacking P2X1 receptors. *Nature* 2000; 403:86-89.
92. Baker SM, Bronner CE, Zhang L, Plug AW, Robatzek M, Warren G, Elliott EA, Yu J, Ashley T, Arnheim N, Flavell RA, Liskay RM. Male mice defective in the DNA mismatch repair gene PMS2 exhibit abnormal chromosome synapsis in meiosis. *Cell* 1995; 82:309-319.
93. Varmuza S, Jurisicova A, Okano K, Hudson J, Boekelheide K, Shipp EB. Spermiogenesis is impaired in mice bearing a targeted mutation in the protein phosphatase 1c gamma gene. *Dev Biol* 1999; 205:98-110.
94. Burton KA, McDermott DA, Wilkes D, Poulsen MN, Nolan MA, Goldstein M, Basson CT, McKnight GS. Haploinsufficiency at the protein kinase A RI alpha gene locus leads to fertility defects in male mice and men. *Mol Endocrinol* 2006; 20:2504-2513.
95. Cho C, Willis WD, Goulding EH, Jung-Ha H, Choi YC, Hecht NB, Eddy EM. Haploinsufficiency of protamine-1 or -2 causes infertility in mice. *Nat Genet* 2001; 28:82-86.
96. Khor B, Bredemeyer AL, Huang CY, Turnbull IR, Evans R, Maggi LB, Jr, White JM, Walker LM, Carnes K, Hess RA, Sleckman BP. Proteasome activator PA200 is required for normal spermatogenesis. *Mol Cell Biol* 2006; 26:2999-3007.
97. Lufkin T, Lohnes D, Mark M, Dierich A, Gorry P, Gaub MP, LeMeur M, Chambon P. High postnatal lethality and testis degeneration in retinoic acid receptor alpha mutant mice. *Proc Natl Acad Sci U S A* 1993; 90:7225-7229.
98. Brunner S, Colman D, Travis AJ, Luhmann UFO, Shi W, Feil S, Imsand C, Nelson J, Grimm C, Rulicke T, Fundele R, Neidhardt J, Berger W. Overexpression of RPGR Leads to Male Infertility in Mice Due to Defects in Flagellar Assembly. *Biol Reprod* 2008; 79:608-617.
99. Kastner P, Mark M, Leid M, Gansmuller A, Chin W, Grondona JM, Decimo D, Krezel W, Dierich A, Chambon P. Abnormal spermatogenesis in RXR beta mutant mice. *Genes Dev* 1996; 10:80-92.
100. Firestein R, Nagy PL, Daly M, Huie P, Conti M, Cleary ML. Male infertility, impaired spermatogenesis, and azoospermia in mice deficient for the pseudophosphatase Sbf1. *J Clin Invest* 2002; 109:1165-1172.
101. Pace AJ, Lee E, Athirakul K, Coffman TM, O'Brien DA, Koller BH. Failure of spermatogenesis in mouse lines deficient in the Na(+)-K(+)-2Cl(-) cotransporter. *J Clin Invest* 2000; 105:441-450.
102. Zhang Z, Kostetskii I, Tang W, Haig-Ladewig L, Sapiro R, Wei Z, Patel AM, Bennett J, Gerton GL, Moss SB, Radice GL, Strauss JF, 3rd. Deficiency of SPAG16L causes male infertility associated with impaired sperm motility. *Biol Reprod* 2006; 74:751-759.
103. Zheng H, Stratton CJ, Morozumi K, Jin J, Yanagimachi R, Yan W. Lack of Spem1 causes aberrant cytoplasm removal, sperm deformation, and male infertility. *Proc Natl Acad Sci U S A* 2007; 104:6852-6857.
104. Hsu S, Hsieh-Li H, Li H. Dysfunctional spermatogenesis in transgenic mice overexpressing bHLH-Zip transcription factor, Spz1. *Experimental Cell Research* 2004; 294:185-198.
105. Pires-daSilva A, Nayernia K, Engel W, Torres M, Stoykova A, Chowdhury K, Gruss P. Mice deficient for spermatid perinuclear RNA-binding protein show neurologic, spermatogenic, and sperm morphological abnormalities. *Dev Biol* 2001; 233:319-328.
106. Wishart MJ, Dixon JE. The archetype STYX/dead-phosphatase complexes with a spermatid mRNA-binding protein and is essential for normal sperm production. *Proc Natl Acad Sci U S A* 2002; 99:2112-2117.

107. Zhong J, Peters AH, Lee K, Braun RE. A double-stranded RNA binding protein required for activation of repressed messages in mammalian germ cells. *Nat Genet* 1999; 22:171-174.
108. Zhang D, Penttila TL, Morris PL, Teichmann M, Roeder RG. Spermiogenesis deficiency in mice lacking the *Trf2* gene. *Science* 2001; 292:1153-1155.
109. Martianov I, Fimia GM, Dierich A, Parvinen M, Sassone-Corsi P, Davidson I. Late arrest of spermiogenesis and germ cell apoptosis in mice lacking the TBP-like *TLF/TRF2* gene. *Mol Cell* 2001; 7:509-515.
110. Jaroszynski L, Dev A, Li M, Meinhardt A, de Rooij DG, Mueller C, Böhm D, Wolf S, Adham IM, Wulf G, Engel W, Nayernia K. Asthenoteratozoospermia in mice lacking testis expressed gene 18 (*Tex18*). *Mol Hum Reprod* 2007; 13:155-163.
111. Yu YE, Zhang Y, Unni E, Shirley CR, Deng JM, Russell LD, Weil MM, Behringer RR, Meistrich ML. Abnormal spermatogenesis and reduced fertility in transition nuclear protein 1-deficient mice. *Proc Natl Acad Sci U S A* 2000; 97:4683-4688.
112. Zhao M, Shirley CR, Yu YE, Mohapatra B, Zhang Y, Unni E, Deng JM, Arango NA, Terry NH, Weil MM, Russell LD, Behringer RR, Meistrich ML. Targeted disruption of the transition protein 2 gene affects sperm chromatin structure and reduces fertility in mice. *Mol Cell Biol* 2001; 21:7243-7255.
113. Roest HP, van Klaveren J, de Wit J, van Gurp CG, Koken MH, Vermey M, van Roijen JH, Hoogerbrugge JW, Vreeburg JT, Baarends WM, Bootsma D, Grootegoed JA, Hoeijmakers JH. Inactivation of the HR6B ubiquitin-conjugating DNA repair enzyme in mice causes male sterility associated with chromatin modification. *Cell* 1996; 86:799-810.
114. Suetsugu S, Banzai Y, Kato M, Fukami K, Kataoka Y, Takai Y, Yoshida N, Takenawa T. Male-specific sterility caused by the loss of CR16. *Genes Cells* 2007; 12:721-733.
115. Kregge JH, John SW, Langenbach LL, Hodgin JB, Hagaman JR, Bachman ES, Jennette JC, O'Brien DA, Smithies O. Male-female differences in fertility and blood pressure in ACE-deficient mice. *Nature* 1995; 375:146-148.
116. Nishimura H, Cho C, Branciforte DR, Myles DG, Primakoff P. Analysis of loss of adhesive function in sperm lacking cyritestin or fertilin beta. *Dev Biol* 2001; 233:204-213.
117. Cho C, Bunch DO, Faure JE, Goulding EH, Eddy EM, Primakoff P, Myles DG. Fertilization defects in sperm from mice lacking fertilin beta. *Science* 1998; 281:1857-1859.
118. Shamsadin R, Adham IM, Nayernia K, Heinlein UA, Oberwinkler H, Engel W. Male mice deficient for germ-cell cyritestin are infertile. *Biol Reprod* 1999; 61:1445-1451.
119. Kang-Decker N, Mantchev GT, Juneja SC, McNiven MA, van Deursen JM. Lack of acrosome formation in *Hrb*-deficient mice. *Science* 2001; 294:1531-1533.
120. Huang LS, Voyiaziakis E, Chen HL, Rubin EM, Gordon JW. A novel functional role for apolipoprotein B in male infertility in heterozygous apolipoprotein B knockout mice. *Proc Natl Acad Sci U S A* 1996; 93:10903-10907.
121. Lu Q, Hasty P, Shur BD. Targeted mutation in beta1,4-galactosyltransferase leads to pituitary insufficiency and neonatal lethality. *Dev Biol* 1997; 181:257-267.
122. Lu Q, Shur BD. Sperm from beta 1,4-galactosyltransferase-null mice are refractory to ZP3-induced acrosome reactions and penetrate the zona pellucida poorly. *Development* 1997; 124:4121-4131.
123. Jin J, Jin N, Zheng H, Ro S, Tafolla D, Sanders KM, Yan W. *Catsper3* and *Catsper4* are essential for sperm hyperactivated motility and male fertility in the mouse. *Biol Reprod* 2007; 77:37-44.

124. Ikawa M, Wada I, Kominami K, Watanabe D, Toshimori K, Nishimune Y, Okabe M. The putative chaperone calmeglin is required for sperm fertility. *Nature* 1997; 387:607-611.
125. Xu X, Toselli PA, Russell LD, Seldin DC. Globozoospermia in mice lacking the casein kinase II alpha' catalytic subunit. *Nat Genet* 1999; 23:118-121.
126. Fisher CR, Graves KH, Parlow AF, Simpson ER. Characterization of mice deficient in aromatase (ArKO) because of targeted disruption of the *cyp19* gene. *Proc Natl Acad Sci U S A* 1998; 95:6965-6970.
127. Robertson KM, O'Donnell L, Jones ME, Meachem SJ, Boon WC, Fisher CR, Graves KH, McLachlan RI, Simpson ER. Impairment of spermatogenesis in mice lacking a functional aromatase (*cyp 19*) gene. *Proc Natl Acad Sci U S A* 1999; 96:7986-7991.
128. Neesen J, Kirschner R, Ochs M, Schmiedl A, Habermann B, Mueller C, Holstein AF, Nuesslein T, Adham I, Engel W. Disruption of an inner arm dynein heavy chain gene results in asthenozoospermia and reduced ciliary beat frequency. *Hum Mol Genet* 2001; 10:1117-1128.
129. Cheng NC, van de Vrugt HJ, van der Valk MA, Oostra AB, Krimpenfort P, de Vries Y, Joenje H, Berns A, Arwert F. Mice with a targeted disruption of the Fanconi anemia homolog *Fanca*. *Hum Mol Genet* 2000; 9:1805-1811.
130. Whitney MA, Royle G, Low MJ, Kelly MA, Axthelm MK, Reifsteck C, Olson S, Braun RE, Heinrich MC, Rathbun RK, Bagby GC, Grompe M. Germ cell defects and hematopoietic hypersensitivity to gamma-interferon in mice with a targeted disruption of the Fanconi anemia C gene. *Blood* 1996; 88:49-58.
131. Ganaïem M, AbuElhija M, Lunenfeld E, Cherniy N, Weisze N, Itach SB, Breitbart H, Apte R, Huleihel M. Effect of IL-1 Receptor Antagonist Gene Deletion on Mouse Male Fertility. *Endocrinology* 2008;
132. Hellsten E, Evans JP, Bernard DJ, Janne PA, Nussbaum RL. Disrupted sperm function and fertilin beta processing in mice deficient in the inositol polyphosphate 5-phosphatase *Inpp5b*. *Dev Biol* 2001; 240:641-653.
133. Yu RN, Ito M, Saunders TL, Camper SA, Jameson JL. Role of *Ahch* in gonadal development and gametogenesis. *Nat Genet* 1998; 20:353-357.
134. Harris T, Marquez B, Suarez S, Schimenti J. Sperm motility defects and infertility in male mice with a mutation in *Nsun7*, a member of the Sun domain-containing family of putative RNA methyltransferases. *Biol Reprod* 2007; 77:376-382.
135. Dai X, Schonbaum C, Degenstein L, Bai W, Mahowald A, Fuchs E. The *ovo* gene required for cuticle formation and oogenesis in flies is involved in hair formation and spermatogenesis in mice. *Genes Dev* 1998; 12:3452-3463.
136. Mbikay M, Tadros H, Ishida N, Lerner CP, De Lamirande E, Chen A, El-Alfy M, Clermont Y, Seidah NG, Chretien M, Gagnon C, Simpson EM. Impaired fertility in mice deficient for the testicular germ-cell protease *PC4*. *Proc Natl Acad Sci U S A* 1997; 94:6842-6846.
137. Ueda Y, Yamaguchi R, Ikawa M, Okabe M, Morii E, Maeda Y, Kinoshita T. *PGAP1* knock-out mice show otocephaly and male infertility. *J Biol Chem* 2007; 282:30373-30380.
138. Kobayashi Y, Watanabe M, Okada Y, Sawa H, Takai H, Nakanishi M, Kawase Y, Suzuki H, Nagashima K, Ikeda K, Motoyama N. Hydrocephalus, situs inversus, chronic sinusitis, and male infertility in DNA polymerase lambda-deficient mice: possible implication for the pathogenesis of immotile cilia syndrome. *Mol Cell Biol* 2002; 22:2769-2776.
139. Skalhegg BS, Huang Y, Su T, Idzerda RL, McKnight GS, Burton KA. Mutation of the  $\alpha$  subunit of PKA leads to growth retardation and sperm dysfunction. *Mol Endocrinol* 2002; 16:630-639.

140. Goffin V, Bouchard B, Ormandy CJ, Weimann E, Ferrag F, Touraine P, Bole-Feysot C, Maaskant RA, Clement-Lacroix P, Edery M, Binart N, Kelly PA. Prolactin: a hormone at the crossroads of neuroimmunoendocrinology. *Ann N Y Acad Sci* 1998; 840:498-509.
141. Yeung CH, Sonnenberg-Riethmacher E, Cooper TG. Infertile spermatozoa of c-ros tyrosine kinase receptor knockout mice show flagellar angulation and maturational defects in cell volume regulatory mechanisms. *Biol Reprod* 1999; 61:1062-1069.
142. Yeung CH, Wagenfeld A, Nieschlag E, Cooper TG. The cause of infertility of male c-ros tyrosine kinase receptor knockout mice. *Biol Reprod* 2000; 63:612-618.
143. Nayernia K, Adham IM, Burkhardt-Gottges E, Neesen J, Rieche M, Wolf S, Sancken U, Kleene K, Engel W. Asthenozoospermia in mice with targeted deletion of the sperm mitochondrion-associated cysteine-rich protein (Smcp) gene. *Mol Cell Biol* 2002; 22:3046-3052.
144. Perl A, Qian Y, Chohan KR, Shirley CR, Amidon W, Banerjee S, Middleton FA, Conkrite KL, Barcza M, Gonchoroff N, Suarez SS, Banki K. Transaldolase is essential for maintenance of the mitochondrial transmembrane potential and fertility of spermatozoa. *Proc Natl Acad Sci U S A* 2006; 103:14813-14818.
145. Roy A, Lin YN, Agno JE, DeMayo FJ, Matzuk MM. Absence of tektin4 causes asthenozoospermia and subfertility in male mice. *FASEB J* 2007; 21:1013-1025.
146. Borghesi A, Ouyang YB, Westmuckett AD, Marcello MR, Landel CP, Evans JP, Moore KL. Targeted disruption of tyrosylprotein sulfotransferase-2, an enzyme that catalyzes post-translational protein tyrosine O-sulfation, causes male infertility. *J Biol Chem* 2006; 281:9423-9431.
147. Sampson MJ, Decker WK, Beaudet AL, Ruitenbeek W, Armstrong D, Hicks MJ, Craigen WJ. Immotile sperm and infertility in mice lacking mitochondrial voltage-dependent anion channel type 3. *J Biol Chem* 2001; 276:39206-39212.
148. Lin YN, Roy A, Yan W, Burns KH, Matzuk MM. Loss of zona pellucida binding proteins in the acrosomal matrix disrupts acrosome biogenesis and sperm morphogenesis. *Mol Cell Biol* 2007; 27:6794-6805.
149. Mhaouty-Kodja S, Lozach A, Habert R, Tanneux M, Guigon C, Brailly-Tabard S, Maltier JP, Legrand-Maltier C. Fertility and spermatogenesis are altered in  $\alpha$ 1b-adrenergic receptor knockout male mice. *J Endocrinol* 2007; 195:281-292.
150. Charest NJ, Zhou ZX, Lubahn DB, Olsen KL, Wilson EM, French FS. A frameshift mutation destabilizes androgen receptor messenger RNA in the Tfm mouse. *Mol Endocrinol* 1991; 5:573-581.
151. Topilko P, Schneider-Maunoury S, Levi G, Trembleau A, Gourdji D, Driancourt MA, Rao CV, Charnay P. Multiple pituitary and ovarian defects in Krox-24 (NGFI-A, Egr-1)-targeted mice. *Mol Endocrinol* 1998; 12:107-122.
152. Kinuta K, Tanaka H, Moriwake T, Aya K, Kato S, Seino Y. Vitamin D is an important factor in estrogen biosynthesis of both female and male gonads. *Endocrinology* 2000; 141:1317-1324.
153. Zhongyi S, Rantakari P, Lamminen T, Toppari J, Poutanen M. Transgenic male mice expressing human hydroxysteroid dehydrogenase 2 indicate a role for the enzyme independent of its action on sex steroids. *Endocrinology* 2007; 148:3827-3836.
154. Qin J, Tsai M, Tsai SY. Essential Roles of COUP-TFII in Leydig Cell Differentiation and Male Fertility. *PLoS ONE* 2008; 3:e3285.
155. Johnson LE, DeLuca HF. Vitamin D receptor null mutant mice fed high levels of calcium are fertile. *J Nutr* 2001; 131:1787-1791.



156. Matzuk MM, Kumar TR, Bradley A. Different phenotypes for mice deficient in either activins or activin receptor type II. *Nature* 1995; 374:356-360.
157. Li SW, Arita M, Fertala A, Bao Y, Kopen GC, Langsjo TK, Hyttinen MM, Helminen HJ, Prockop DJ. Transgenic mice with inactive alleles for procollagen N-proteinase (ADAMTS-2) develop fragile skin and male sterility. *Biochem J* 2001; 355:271-278.
158. Behringer RR, Finegold MJ, Cate RL. Mullerian-inhibiting substance function during mammalian sexual development. *Cell* 1994; 79:415-425.
159. Durlinger AL, Kramer P, Karels B, de Jong FH, Uilenbroek JT, Grootegoed JA, Themmen AP. Control of primordial follicle recruitment by anti-Mullerian hormone in the mouse ovary. *Endocrinology* 1999; 140:5789-5796.
160. Mishina Y, Rey R, Finegold MJ, Matzuk MM, Josso N, Cate RL, Behringer RR. Genetic analysis of the Mullerian-inhibiting substance signal transduction pathway in mammalian sexual differentiation. *Genes Dev* 1996; 10:2577-2587.
161. Kojima S, Hatano M, Okada S, Fukuda T, Toyama Y, Yuasa S, Ito H, Tokuhisa T. Testicular germ cell apoptosis in Bcl6-deficient mice. *Development* 2001; 128:57-65.
162. Zhao GQ, Liaw L, Hogan BL. Bone morphogenetic protein 8A plays a role in the maintenance of spermatogenesis and the integrity of the epididymis. *Development* 1998; 125:1103-1112.
163. Hudson DF, Fowler KJ, Earle E, Saffery R, Kalitsis P, Trowell H, Hill J, Wreford NG, de Kretser DM, Cancilla MR, Howman E, Hii L, Cutts SM, Irvine DV, Choo KH. Centromere protein B null mice are mitotically and meiotically normal but have lower body and testis weights. *J Cell Biol* 1998; 141:309-319.
164. Fowler KJ, Hudson DF, Salamonsen LA, Edmondson SR, Earle E, Sibson MC, Choo KH. Uterine dysfunction and genetic modifiers in centromere protein B-deficient mice. *Genome Res* 2000; 10:30-41.
165. Kendall SK, Samuelson LC, Saunders TL, Wood RI, Camper SA. Targeted disruption of the pituitary glycoprotein hormone alpha-subunit produces hypogonadal and hypothyroid mice. *Genes Dev* 1995; 9:2007-2019.
166. Gow A, Southwood CM, Li JS, Pariali M, Riordan GP, Brodie SE, Danias J, Bronstein JM, Kachar B, Lazzarini RA. CNS myelin and sertoli cell tight junction strands are absent in Osp/claudin-11 null mice. *Cell* 1999; 99:649-659.
167. Cohen PE, Zhu L, Pollard JW. Absence of colony stimulating factor-1 in osteopetrotic (csfmop/csfmop) mice disrupts estrous cycles and ovulation. *Biol Reprod* 1997; 56:110-118.
168. Luong MX, van der Meijden CM, Xing D, Hesselton R, Monuki ES, Jones SN, Lian JB, Stein JL, Stein GS, Neufeld EJ, van Wijnen AJ. Genetic ablation of the CDP/Cux protein C terminus results in hair cycle defects and reduced male fertility. *Mol Cell Biol* 2002; 22:1424-1437.
169. Hu MC, Hsu NC, El Hadj NB, Pai CI, Chu HP, Wang CK, Chung BC. Steroid deficiency syndromes in mice with targeted disruption of Cyp11a1. *Mol Endocrinol* 2002; 16:1943-1950.
170. Miyamoto N, Yoshida M, Kuratani S, Matsuo I, Aizawa S. Defects of urogenital development in mice lacking Emx2. *Development* 1997; 124:1653-1664.
171. Laing MA, Coonrod S, Hinton BT, Downie JW, Tozer R, Rudnicki MA, Hassell JA. Male sexual dysfunction in mice bearing targeted mutant alleles of the PEA3 ets gene. *Mol Cell Biol* 2000; 20:9337-9345.
172. Koomen M, Cheng NC, van de Vrugt HJ, Godthelp BC, van der Valk MA, Oostra AB, Zdzienicka MZ, Joenje H, Arwert F. Reduced fertility and hypersensitivity to mitomycin C characterize Fancg/Xrcc9 null mice. *Hum Mol Genet* 2002; 11:273-281.

173. Colvin JS, Green RP, Schmahl J, Capel B, Ornitz DM. Male-to-female sex reversal in mice lacking fibroblast growth factor 9. *Cell* 2001; 104:875-889.
174. Kooy RF, D'Hooge R, Reyniers E, Bakker CE, Nagels G, De Boulle K, Storm K, Clincke G, De Deyn PP, Oostra BA, Willems PJ. Transgenic mouse model for the fragile X syndrome. *Am J Med Genet* 1996; 64:241-245.
175. Settle S, Marker P, Gurley K, Sinha A, Thacker A, Wang Y, Higgins K, Cunha G, Kingsley DM. The BMP family member Gdf7 is required for seminal vesicle growth, branching morphogenesis, and cytodifferentiation. *Dev Biol* 2001; 234:138-150.
176. Kumar TR, Wiseman AL, Kala G, Kala SV, Matzuk MM, Lieberman MW. Reproductive defects in gamma-glutamyl transpeptidase-deficient mice. *Endocrinology* 2000; 141:4270-4277.
177. Lieberman MW, Wiseman AL, Shi ZZ, Carter BZ, Barrios R, Ou CN, Chevez-Barrios P, Wang Y, Habib GM, Goodman JC, Huang SL, Lebovitz RM, Matzuk MM. Growth retardation and cysteine deficiency in gamma-glutamyl transpeptidase-deficient mice. *Proc Natl Acad Sci U S A* 1996; 93:7923-7926.
178. Couldrey C, Carlton MB, Nolan PM, Colledge WH, Evans MJ. A retroviral gene trap insertion into the histone 3.3A gene causes partial neonatal lethality, stunted growth, neuromuscular deficits and male sub-fertility in transgenic mice. *Hum Mol Genet* 1999; 8:2489-2495.
179. Lee YH, Sauer B, Gonzalez FJ. Laron dwarfism and non-insulin-dependent diabetes mellitus in the Hnf-1alpha knockout mouse. *Mol Cell Biol* 1998; 18:3059-3068.
180. Satokata I, Benson G, Maas R. Sexually dimorphic sterility phenotypes in Hoxa10-deficient mice. *Nature* 1995; 374:460-463.
181. Hsieh-Li HM, Witte DP, Weinstein M, Branford W, Li H, Small K, Potter SS. Hoxa 11 structure, extensive antisense transcription, and function in male and female fertility. *Development* 1995; 121:1373-1385.
182. Matzuk MM, Finegold MJ, Su JG, Hsueh AJ, Bradley A. Alpha-inhibin is a tumour-suppressor gene with gonadal specificity in mice. *Nature* 1992; 360:313-319.
183. Kumar TR, Wang Y, Matzuk MM. Gonadotropins are essential modifier factors for gonadal tumor development in inhibin-deficient mice. *Endocrinology* 1996; 137:4210-4216.
184. Swerdloff RS, Batt RA, Bray GA. Reproductive hormonal function in the genetically obese (ob/ob) mouse. *Endocrinology* 1976; 98:1359-1364.
185. Swerdloff RS, Peterson M, Vera A, Batt RA, Heber D, Bray GA. The hypothalamic-pituitary axis in genetically obese (ob/ob) mice: response to luteinizing hormone-releasing hormone. *Endocrinology* 1978; 103:542-547.
186. Chua SC, Jr, Chung WK, Wu-Peng XS, Zhang Y, Liu SM, Tartaglia L, Leibel RL. Phenotypes of mouse diabetes and rat fatty due to mutations in the OB (leptin) receptor. *Science* 1996; 271:994-996.
187. Bessone S, Vidal F, Le Bouc Y, Epelbaum J, Bluet-Pajot MT, Darmon M. EMK protein kinase-null mice: dwarfism and hypofertility associated with alterations in the somatotrope and prolactin pathways. *Dev Biol* 1999; 214:87-101.
188. Bruning JC, Gautam D, Burks DJ, Gillette J, Schubert M, Orban PC, Klein R, Krone W, Muller-Wieland D, Kahn CR. Role of brain insulin receptor in control of body weight and reproduction. *Science* 2000; 289:2122-2125.
189. Luo X, Ikeda Y, Parker KL. A cell-specific nuclear receptor is essential for adrenal and gonadal development and sexual differentiation. *Cell* 1994; 77:481-490.

190. Li S, Crenshaw EB,3rd, Rawson EJ, Simmons DM, Swanson LW, Rosenfeld MG. Dwarf locus mutants lacking three pituitary cell types result from mutations in the POU-domain gene *pit-1*. *Nature* 1990; 347:528-533.
191. Choi J, Nannenga B, Demidov ON, Bulavin DV, Cooney A, Brayton C, Zhang Y, Mbawuiké IN, Bradley A, Appella E, Donehower LA. Mice deficient for the wild-type p53-induced phosphatase gene (*Wip1*) exhibit defects in reproductive organs, immune function, and cell cycle control. *Mol Cell Biol* 2002; 22:1094-1105.
192. Ng JM, Vrieling H, Sugasawa K, Ooms MP, Grootegoed JA, Vreeburg JT, Visser P, Beems RB, Gorgels TG, Hanaoka F, Hoeijmakers JH, van der Horst GT. Developmental defects and male sterility in mice lacking the ubiquitin-like DNA repair gene *mHR23B*. *Mol Cell Biol* 2002; 22:1233-1245.
193. Lohnes D, Kastner P, Dierich A, Mark M, LeMeur M, Chambon P. Function of retinoic acid receptor gamma in the mouse. *Cell* 1993; 73:643-658.
194. Overbeek PA, Gorlov IP, Sutherland RW, Houston JB, Harrison WR, Boettger-Tong HL, Bishop CE, Agoulnik AI. A transgenic insertion causing cryptorchidism in mice. *Genesis* 2001; 30:26-35.
195. Murer V, Spetz JF, Hengst U, Altrogge LM, de Agostini A, Monard D. Male fertility defects in mice lacking the serine protease inhibitor *protease nexin-1*. *Proc Natl Acad Sci U S A* 2001; 98:3029-3033.
196. Uhrin P, Dewerchin M, Hilpert M, Chrenek P, Schofer C, Zechmeister-Machhart M, Kronke G, Vales A, Carmeliet P, Binder BR, Geiger M. Disruption of the protein C inhibitor gene results in impaired spermatogenesis and male infertility. *J Clin Invest* 2000; 106:1531-1539.
197. Ohtsuka S, Takaki S, Iseki M, Miyoshi K, Nakagata N, Kataoka Y, Yoshida N, Takatsu K, Yoshimura A. *SH2-B* is required for both male and female reproduction. *Mol Cell Biol* 2002; 22:3066-3077.
198. Supp DM, Witte DP, Branford WW, Smith EP, Potter SS. *Sp4*, a member of the *Sp1*-family of zinc finger transcription factors, is required for normal murine growth, viability, and male fertility. *Dev Biol* 1996; 176:284-299.
199. Caron KM, Soo SC, Wetsel WC, Stocco DM, Clark BJ, Parker KL. Targeted disruption of the mouse gene encoding steroidogenic acute regulatory protein provides insights into congenital lipid adrenal hyperplasia. *Proc Natl Acad Sci U S A* 1997; 94:11540-11545.
200. Lee HW, Blasco MA, Gottlieb GJ, Horner JW,2nd, Greider CW, DePinho RA. Essential role of mouse telomerase in highly proliferative organs. *Nature* 1998; 392:569-574.
201. Smith CL, DeVera DG, Lamb DJ, Nawaz Z, Jiang YH, Beaudet AL, O'Malley BW. Genetic ablation of the steroid receptor coactivator-ubiquitin ligase, *E6-AP*, results in tissue-selective steroid hormone resistance and defects in reproduction. *Mol Cell Biol* 2002; 22:525-535.
202. Kreidberg JA, Sariola H, Loring JM, Maeda M, Pelletier J, Housman D, Jaenisch R. *WT-1* is required for early kidney development. *Cell* 1993; 74:679-691.
203. Parr BA, McMahon AP. Sexually dimorphic development of the mammalian reproductive tract requires *Wnt-7a*. *Nature* 1998; 395:707-710.
